# Supplementary material for: Prevalence and outcomes of chronic liver disease in patients receiving dialysis: systematic review and meta-analysis
Source: PubMed Central journal article supplement — Clin Kidney J. 2021 Nov 18;15(4):747–57. doi: 10.1093/ckj/sfab230 (PMC8967682; doi:10.1093/ckj/sfab230), 2021-11-18
Supplement: sfab230_supplemental_file.pdf [file sfab230_supplemental_file.pdf]

## Supplemental Data

### Supplemental Table 1 Newcastle Ottawa Risk of Bias Scale: Case Control and Case Series Studies

|                  | Selection (max 4)                |                                 |                       |                        | Comparability (max 2)            |                                                 | Exposure (max 3)         |                                                     |                   |   |   |
|------------------|----------------------------------|---------------------------------|-----------------------|------------------------|----------------------------------|-------------------------------------------------|--------------------------|-----------------------------------------------------|-------------------|---|---|
|                  | Is the case definition adequate? | Representativeness of the cases | Selection of controls | Definition of controls | Study controls for comorbidities | Study controls for any other additional factors | Ascertainment of outcome | Same method of ascertainment for cases and controls | Non-response rate |   |   |
| De Vecchi et al. | +                                | +                               | +                     | +                      |                                  | +                                               | +                        | +                                                   | +                 |   | 8 |
| Lee et al.       | +                                | +                               | +                     | +                      | +                                | +                                               | +                        | +                                                   | +                 |   | 9 |
| Huang et al.     | +                                | +                               | +                     | +                      |                                  | +                                               | +                        | +                                                   | +                 |   | 8 |
| Marcus et al.    | +                                | +                               |                       |                        |                                  |                                                 | +                        |                                                     |                   | + | 4 |



**Supplemental Table 3 Newcastle Ottawa Risk of Bias Scale: Cross Sectional Studies**

|                | Selection (max 4)                        |             |                                 | Comparability (max 2)     |                                  |                                                 | Outcome (max 2)       |                              |   |
|----------------|------------------------------------------|-------------|---------------------------------|---------------------------|----------------------------------|-------------------------------------------------|-----------------------|------------------------------|---|
|                | Representativeness of the exposed cohort | Sample size | Selection of non-exposed cohort | Ascertainment of exposure | Study controls for comorbidities | Study controls for any other additional factors | Assessment of outcome | Appropriate statistical test |   |
| Stolic et al.  |                                          |             | +                               | +                         | +                                | +                                               | +                     | +                            | 6 |
| Behairy et al. |                                          |             |                                 | +                         | +                                |                                                 | +                     | +                            | 4 |

## Supplemental Table 4 Sensitivity Analyses

| Analysis                                                                                      | Study (ies) removed                                       | Reason for removal                   | Results summary with study (ies) removed                                                            |
|-----------------------------------------------------------------------------------------------|-----------------------------------------------------------|--------------------------------------|-----------------------------------------------------------------------------------------------------|
| Severity of cirrhosis in ESKD patients (Table 2)                                              | Marcus et al.                                             | High risk of bias                    | Child-Pugh A (n= 464; 61%), Child-Pugh B (n = 171; 22%), Child-Pugh C (n = 131; 17%)                |
| Aetiology of cirrhosis in ESKD patients (Table 3)                                             | Marcus et al.                                             | High risk of bias                    | Results unchanged                                                                                   |
| Prevalence of cirrhosis in dialysis patients by modality (Figure 2)                           | Marcus et al.                                             | High risk of bias                    | Prevalence 4.97% (95% CI 3.76-6.18%), I <sup>2</sup> 98%                                            |
| Prevalence of cirrhosis in dialysis patients by modality (Figure 2)                           | Marcus et al., De Vecchi et al., Huang et al., Lee et al. | Case control and Case series studies | Prevalence 4.63% (95% CI 3.27-5.98), I <sup>2</sup> 99%                                             |
| Prevalence of NAFLD in dialysis patients (Figure 3)                                           | Mikolasevic et al., Stolic et al., Behairy et al.         | High risk of bias                    | No results – all studies at high risk of bias                                                       |
| Association between death in dialysis patients with and without cirrhosis or NAFLD (Figure 4) | Espinosa et al., Huang et al.                             | Outlier results                      | OR for mortality in cirrhosis subgroup 2.26 (1.51-3.37), I <sup>2</sup> 85% (Supplemental Figure 3) |
|                                                                                               |                                                           |                                      |                                                                                                     |

**Supplemental Table 5 Relationship between severity of cirrhosis and mortality in ESKD patients**

| <b>Study</b>     | <b>Date of Publication</b> | <b>Length of follow up</b> | <b>Mortality</b>                                                                                                         |
|------------------|----------------------------|----------------------------|--------------------------------------------------------------------------------------------------------------------------|
| Artru et al.     | 2019                       | 2 years                    | 2 year mortality: 37.2% for patients with compensated cirrhosis; 55.9% for patients with decompensated cirrhosis         |
| Che-Yi et al.    | 2016                       | 6 years                    | Mortality hazard ratio of 8.92 (95% CI 6.73-11.82) per Child-Pugh class using a Cox-Proportional Hazard Regression Model |
| De Vecchi et al. | 2002                       | 3.2 years                  | Mortality: Child-Pugh Class A 20%, Child-Pugh Class B 40%, Child-Pugh Class C 50%                                        |
| Marcus et al.    | 1992                       | 2.1 years                  | Mortality: Child-Pugh Class B 43%, Child-Pugh Class C 50%                                                                |

**Supplemental Table 6 PRISMA 2020 Abstract Checklist**

| Section and Topic       | Item # | Checklist item                                                                                                                                                                                                                                                                                        | Reported (Yes/No)                                               |
|-------------------------|--------|-------------------------------------------------------------------------------------------------------------------------------------------------------------------------------------------------------------------------------------------------------------------------------------------------------|-----------------------------------------------------------------|
| <b>TITLE</b>            |        |                                                                                                                                                                                                                                                                                                       |                                                                 |
| Title                   | 1      | Identify the report as a systematic review.                                                                                                                                                                                                                                                           | Yes                                                             |
| <b>BACKGROUND</b>       |        |                                                                                                                                                                                                                                                                                                       |                                                                 |
| Objectives              | 2      | Provide an explicit statement of the main objective(s) or question(s) the review addresses.                                                                                                                                                                                                           | Yes                                                             |
| <b>METHODS</b>          |        |                                                                                                                                                                                                                                                                                                       |                                                                 |
| Eligibility criteria    | 3      | Specify the inclusion and exclusion criteria for the review.                                                                                                                                                                                                                                          | Inclusion criteria only specified due to word limit constraints |
| Information sources     | 4      | Specify the information sources (e.g. databases, registers) used to identify studies and the date when each was last searched.                                                                                                                                                                        | Yes                                                             |
| Risk of bias            | 5      | Specify the methods used to assess risk of bias in the included studies.                                                                                                                                                                                                                              | Not included due to word limit constraints                      |
| Synthesis of results    | 6      | Specify the methods used to present and synthesise results.                                                                                                                                                                                                                                           | Not included due to word limit constraints                      |
| <b>RESULTS</b>          |        |                                                                                                                                                                                                                                                                                                       |                                                                 |
| Included studies        | 7      | Give the total number of included studies and participants and summarise relevant characteristics of studies.                                                                                                                                                                                         | Yes                                                             |
| Synthesis of results    | 8      | Present results for main outcomes, preferably indicating the number of included studies and participants for each. If meta-analysis was done, report the summary estimate and confidence/credible interval. If comparing groups, indicate the direction of the effect (i.e. which group is favoured). | Yes                                                             |
| <b>DISCUSSION</b>       |        |                                                                                                                                                                                                                                                                                                       |                                                                 |
| Limitations of evidence | 9      | Provide a brief summary of the limitations of the evidence included in the review (e.g. study risk of bias, inconsistency and imprecision).                                                                                                                                                           | Yes                                                             |

| Section and Topic | Item # | Checklist item                                                              | Reported (Yes/No)                                              |
|-------------------|--------|-----------------------------------------------------------------------------|----------------------------------------------------------------|
| Interpretation    | 10     | Provide a general interpretation of the results and important implications. | Yes                                                            |
| <b>OTHER</b>      |        |                                                                             |                                                                |
| Funding           | 11     | Specify the primary source of funding for the review.                       | N/A                                                            |
| Registration      | 12     | Provide the register name and registration number.                          | Registration number not included due to word limit constraints |

**Supplemental Table 7 PRISMA 2020 Main Checklist**

| <b>Topic</b>                   | <b>No.</b> | <b>Item</b>                                                                                                                                                                                                                                                                                          | <b>Location where item is reported</b> |
|--------------------------------|------------|------------------------------------------------------------------------------------------------------------------------------------------------------------------------------------------------------------------------------------------------------------------------------------------------------|----------------------------------------|
| <b>TITLE</b>                   |            |                                                                                                                                                                                                                                                                                                      |                                        |
| <b>Title</b>                   | 1          | Identify the report as a systematic review.                                                                                                                                                                                                                                                          | Page 1                                 |
| <b>ABSTRACT</b>                |            |                                                                                                                                                                                                                                                                                                      |                                        |
| <b>Abstract</b>                | 2          | See the PRISMA 2020 for Abstracts checklist                                                                                                                                                                                                                                                          |                                        |
| <b>INTRODUCTION</b>            |            |                                                                                                                                                                                                                                                                                                      |                                        |
| <b>Rationale</b>               | 3          | Describe the rationale for the review in the context of existing knowledge.                                                                                                                                                                                                                          | Page 2                                 |
| <b>Objectives</b>              | 4          | Provide an explicit statement of the objective(s) or question(s) the review addresses.                                                                                                                                                                                                               | Page 3                                 |
| <b>METHODS</b>                 |            |                                                                                                                                                                                                                                                                                                      |                                        |
| <b>Eligibility criteria</b>    | 5          | Specify the inclusion and exclusion criteria for the review and how studies were grouped for the syntheses.                                                                                                                                                                                          | Page 3-4                               |
| <b>Information sources</b>     | 6          | Specify all databases, registers, websites, organisations, reference lists and other sources searched or consulted to identify studies. Specify the date when each source was last searched or consulted.                                                                                            | Page 3                                 |
| <b>Search strategy</b>         | 7          | Present the full search strategies for all databases, registers and websites, including any filters and limits used.                                                                                                                                                                                 | Available via URL link on page 3       |
| <b>Selection process</b>       | 8          | Specify the methods used to decide whether a study met the inclusion criteria of the review, including how many reviewers screened each record and each report retrieved, whether they worked independently, and if applicable, details of automation tools used in the process.                     | Page 3-4                               |
| <b>Data collection process</b> | 9          | Specify the methods used to collect data from reports, including how many reviewers collected data from each report, whether they worked independently, any processes for obtaining or confirming data from study investigators, and if applicable, details of automation tools used in the process. | Page 3-4                               |



| Topic                                | No. | Item                                                                                                                                                                                                                                                                          | Location where item is reported |
|--------------------------------------|-----|-------------------------------------------------------------------------------------------------------------------------------------------------------------------------------------------------------------------------------------------------------------------------------|---------------------------------|
| <b>Data items</b>                    | 10a | List and define all outcomes for which data were sought. Specify whether all results that were compatible with each outcome domain in each study were sought (e.g. for all measures, time points, analyses), and if not, the methods used to decide which results to collect. | Page 4                          |
|                                      | 10b | List and define all other variables for which data were sought (e.g. participant and intervention characteristics, funding sources). Describe any assumptions made about any missing or unclear information.                                                                  | Page 4                          |
| <b>Study risk of bias assessment</b> | 11  | Specify the methods used to assess risk of bias in the included studies, including details of the tool(s) used, how many reviewers assessed each study and whether they worked independently, and if applicable, details of automation tools used in the process.             | Page 5-6                        |
| <b>Effect measures</b>               | 12  | Specify for each outcome the effect measure(s) (e.g. risk ratio, mean difference) used in the synthesis or presentation of results.                                                                                                                                           | Page 5                          |
| <b>Synthesis methods</b>             | 13a | Describe the processes used to decide which studies were eligible for each synthesis (e.g. tabulating the study intervention characteristics and comparing against the planned groups for each synthesis (item 5)).                                                           | Page 6, Figure 1 on Page 23     |
|                                      | 13b | Describe any methods required to prepare the data for presentation or synthesis, such as handling of missing summary statistics, or data conversions.                                                                                                                         | Page 5-6                        |
|                                      | 13c | Describe any methods used to tabulate or visually display results of individual studies and syntheses.                                                                                                                                                                        | Page 4-6                        |
|                                      | 13d | Describe any methods used to synthesize results and provide a rationale for the choice(s). If meta-analysis was performed, describe the model(s), method(s) to identify the presence and extent of statistical heterogeneity, and software package(s) used.                   | Page 5-6                        |
|                                      | 13e | Describe any methods used to explore possible causes of heterogeneity among study results (e.g. subgroup analysis, meta-regression).                                                                                                                                          | Page 5-6                        |
|                                      | 13f | Describe any sensitivity analyses conducted to assess robustness of the synthesized results.                                                                                                                                                                                  | Page 6                          |

| Topic                                | No. | Item                                                                                                                                                                                                                                                                                 | Location where item is reported                                         |
|--------------------------------------|-----|--------------------------------------------------------------------------------------------------------------------------------------------------------------------------------------------------------------------------------------------------------------------------------------|-------------------------------------------------------------------------|
| <b>Reporting bias assessment</b>     | 14  | Describe any methods used to assess risk of bias due to missing results in a synthesis (arising from reporting biases).                                                                                                                                                              | Page 5                                                                  |
| <b>Certainty assessment</b>          | 15  | Describe any methods used to assess certainty (or confidence) in the body of evidence for an outcome.                                                                                                                                                                                | Page 5-6                                                                |
| <b>RESULTS</b>                       |     |                                                                                                                                                                                                                                                                                      |                                                                         |
| <b>Study selection</b>               | 16a | Describe the results of the search and selection process, from the number of records identified in the search to the number of studies included in the review, ideally using a flow diagram.                                                                                         | Figure 1, page 23                                                       |
|                                      | 16b | Cite studies that might appear to meet the inclusion criteria, but which were excluded, and explain why they were excluded.                                                                                                                                                          | N/A                                                                     |
| <b>Study characteristics</b>         | 17  | Cite each included study and present its characteristics.                                                                                                                                                                                                                            | Table 1, Page 18-19                                                     |
| <b>Risk of bias in studies</b>       | 18  | Present assessments of risk of bias for each included study.                                                                                                                                                                                                                         | Supplemental Tables 1-3                                                 |
| <b>Results of individual studies</b> | 19  | For all outcomes, present, for each study: (a) summary statistics for each group (where appropriate) and (b) an effect estimate and its precision (e.g. confidence/credible interval), ideally using structured tables or plots.                                                     | Tables 2-3, Page 20-1, Figures 2-4, Page 23-5, Supplemental Figures 1-2 |
| <b>Results of syntheses</b>          | 20a | For each synthesis, briefly summarise the characteristics and risk of bias among contributing studies.                                                                                                                                                                               | Page 7-9                                                                |
|                                      | 20b | Present results of all statistical syntheses conducted. If meta-analysis was done, present for each the summary estimate and its precision (e.g. confidence/credible interval) and measures of statistical heterogeneity. If comparing groups, describe the direction of the effect. | Figures 2-4, Page 23-5                                                  |
|                                      | 20c | Present results of all investigations of possible causes of heterogeneity among study results.                                                                                                                                                                                       | Supplemental Figures 3-6                                                |
|                                      | 20d | Present results of all sensitivity analyses conducted to assess the robustness of the synthesized results.                                                                                                                                                                           | Supplemental Table 4                                                    |
| <b>Reporting biases</b>              | 21  | Present assessments of risk of bias due to missing results (arising from reporting biases) for each synthesis assessed.                                                                                                                                                              | Supplemental Figure 7                                                   |
| <b>Certainty of evidence</b>         | 22  | Present assessments of certainty (or confidence) in the body of evidence for each outcome assessed.                                                                                                                                                                                  | Page 7-9                                                                |

| Topic                                                 | No. | Item                                                                                                                                                                                                                                       | Location where item is reported |
|-------------------------------------------------------|-----|--------------------------------------------------------------------------------------------------------------------------------------------------------------------------------------------------------------------------------------------|---------------------------------|
| <b>DISCUSSION</b>                                     |     |                                                                                                                                                                                                                                            |                                 |
| <b>Discussion</b>                                     | 23a | Provide a general interpretation of the results in the context of other evidence.                                                                                                                                                          | Pages 10-14                     |
|                                                       | 23b | Discuss any limitations of the evidence included in the review.                                                                                                                                                                            | Pages 10-14                     |
|                                                       | 23c | Discuss any limitations of the review processes used.                                                                                                                                                                                      | Pages 10-14                     |
|                                                       | 23d | Discuss implications of the results for practice, policy, and future research.                                                                                                                                                             | Pages 13-14                     |
| <b>OTHER INFORMATION</b>                              |     |                                                                                                                                                                                                                                            |                                 |
| <b>Registration and protocol</b>                      | 24a | Provide registration information for the review, including register name and registration number, or state that the review was not registered.                                                                                             | Page 3                          |
|                                                       | 24b | Indicate where the review protocol can be accessed, or state that a protocol was not prepared.                                                                                                                                             | Page 3                          |
|                                                       | 24c | Describe and explain any amendments to information provided at registration or in the protocol.                                                                                                                                            | Can be reviewed via PROSPERO    |
| <b>Support</b>                                        | 25  | Describe sources of financial or non-financial support for the review, and the role of the funders or sponsors in the review.                                                                                                              | N/A                             |
| <b>Competing interests</b>                            | 26  | Declare any competing interests of review authors.                                                                                                                                                                                         | N/A                             |
| <b>Availability of data, code and other materials</b> | 27  | Report which of the following are publicly available and where they can be found: template data collection forms; data extracted from included studies; data used for all analyses; analytic code; any other materials used in the review. | See statement on page 3         |

## Supplemental Figure 1 Association between cardiovascular death, infectious death, cancer death and liver death in dialysis patients with and without cirrhosis

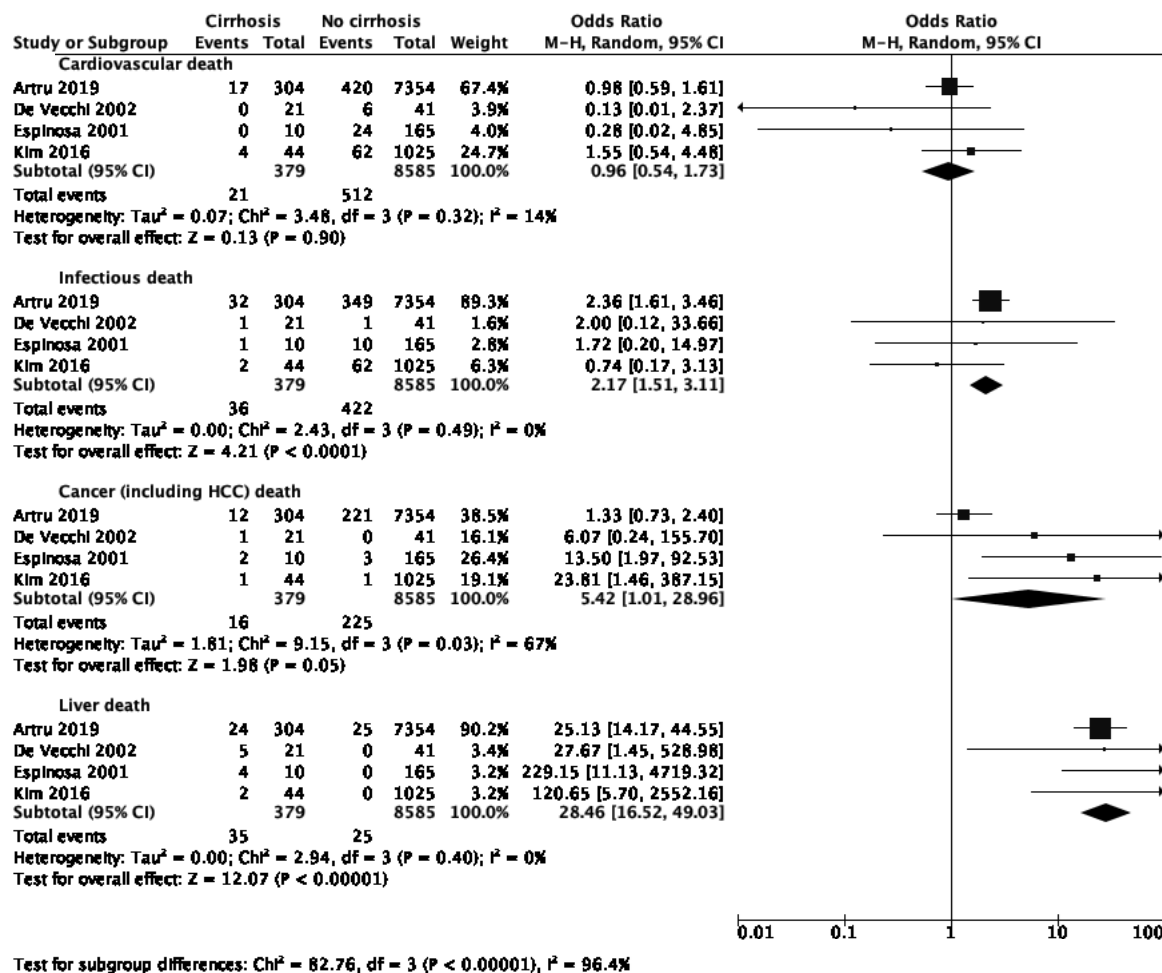

M-H = Mantel-Haenszel; CI = Confidence Interval; df = degrees of freedom; p = p-value;  $I^2$  = total variability due to heterogeneity

## Supplemental Figure 2 Association between diabetes mellitus, hepatitis B and hepatitis C infection and development of cirrhosis in dialysis patients

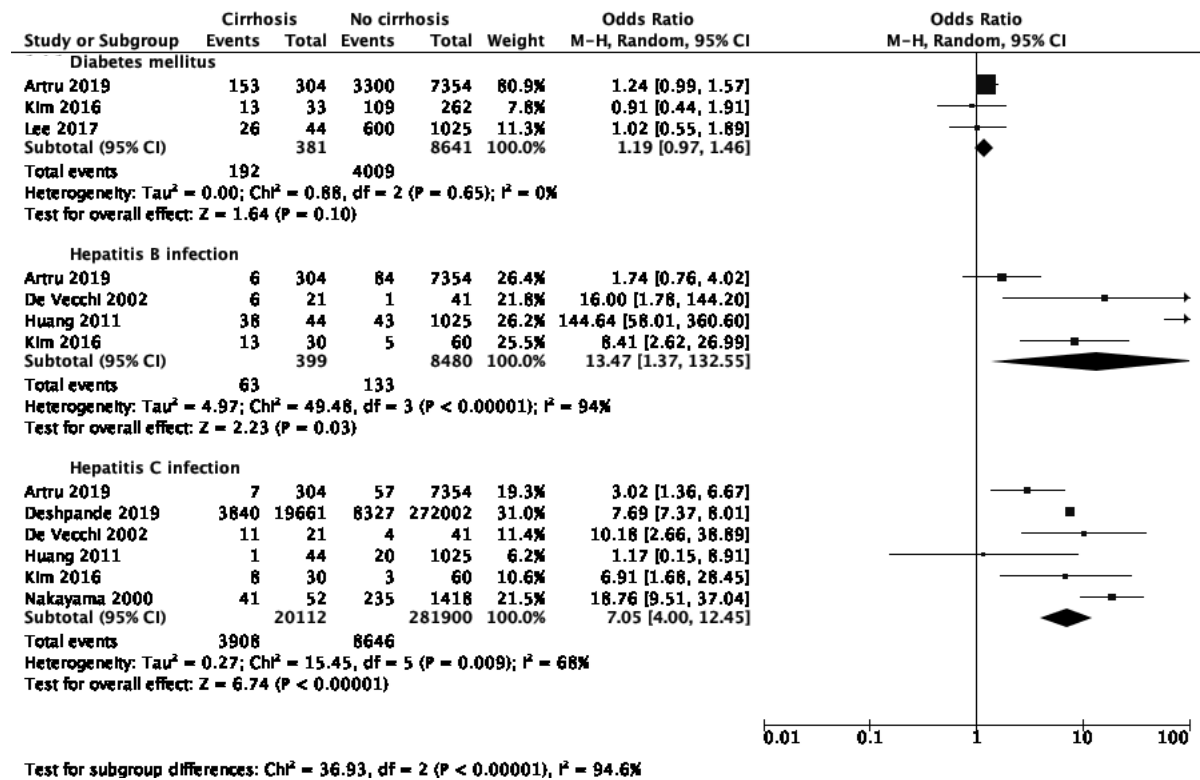

M-H = Mantel-Haenszel; CI = Confidence Interval; df = degrees of freedom; p = p-value; I<sup>2</sup> = total variability due to heterogeneity

**Supplemental Figure 3 Association between death in dialysis patients with and without cirrhosis or NAFLD (with data from outlier studies removed)**

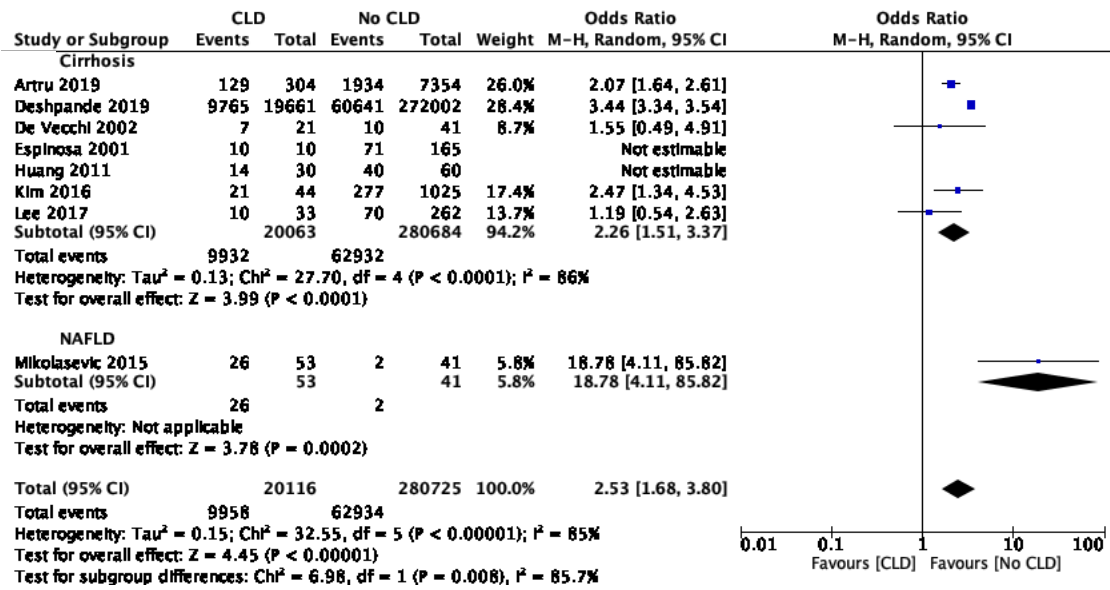

**Supplemental Figure 4 Moderator analysis of the effect of age on cirrhosis prevalence in dialysis patients**

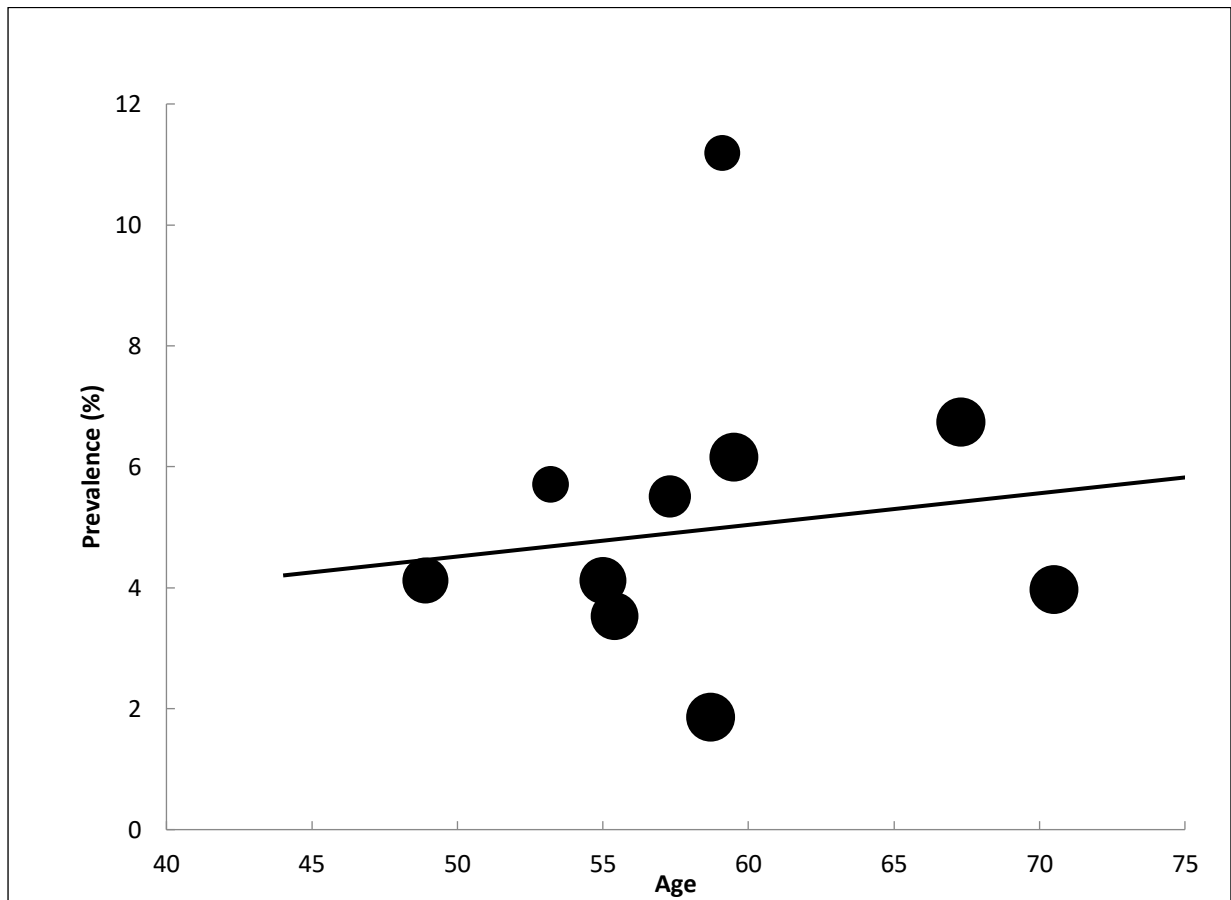

P = 0.673

**Supplemental Figure 5 Moderator analysis of the effect of study size on cirrhosis prevalence in dialysis patients**

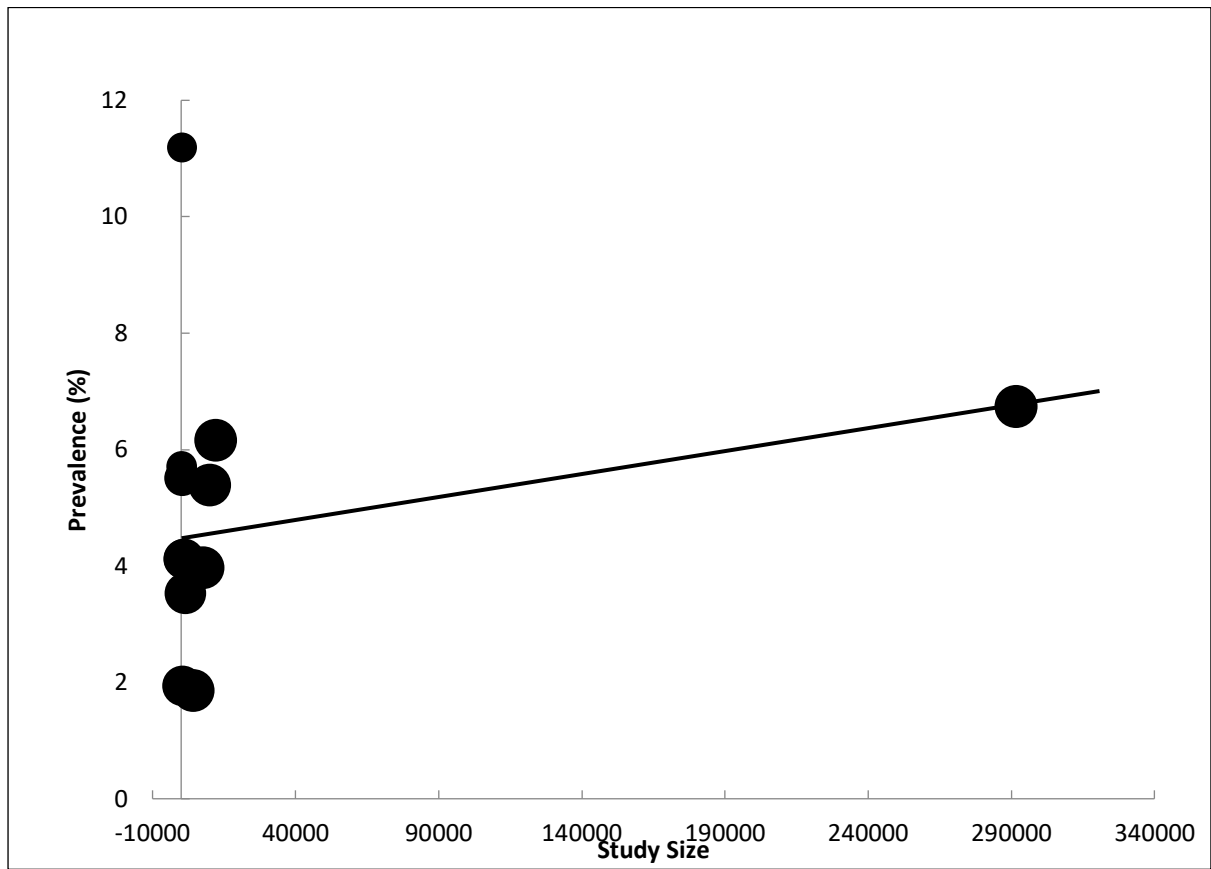

P = 0.309



**Supplemental Figure 6 Moderator analysis of the effect of gender on cirrhosis prevalence in dialysis patients**

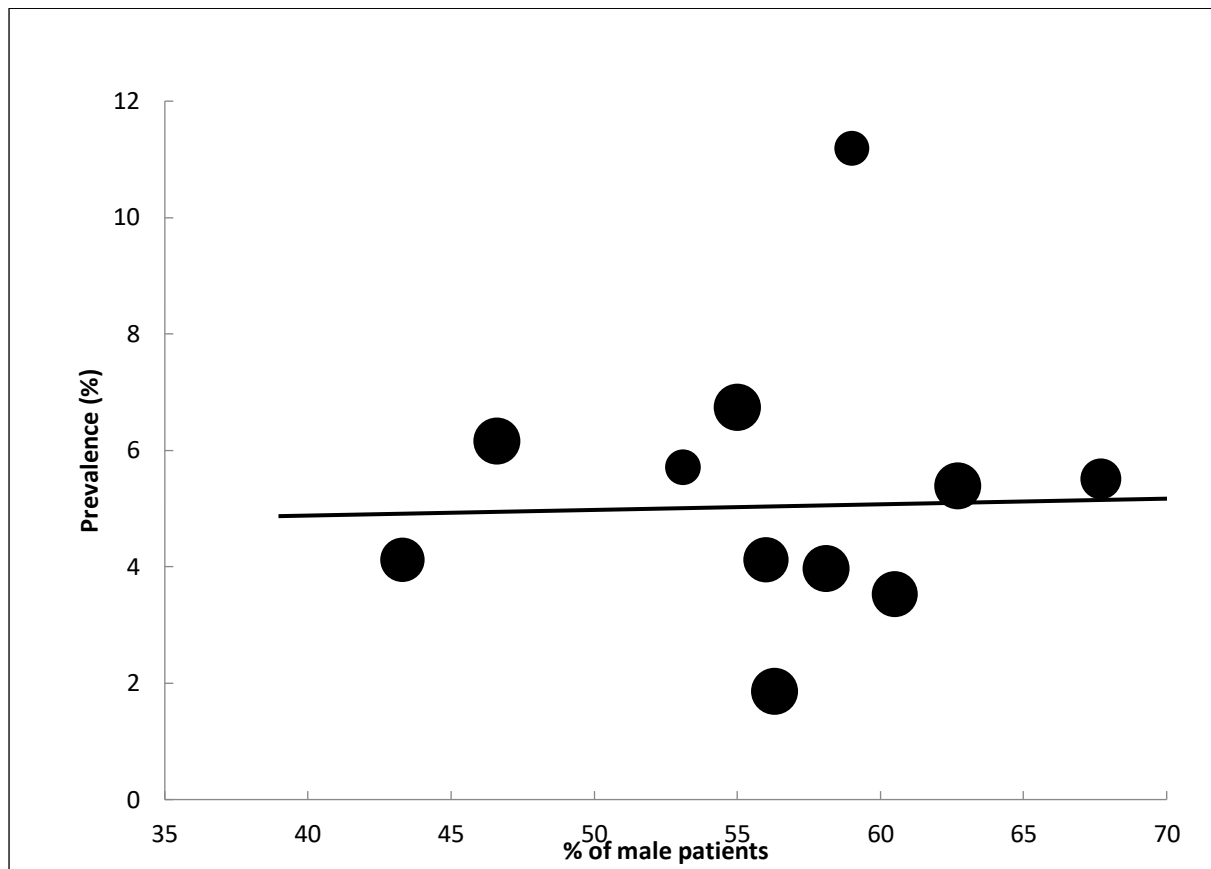

P = 0.928

**Supplemental Figure 7 Moderator analysis of the effect of year of study publication on cirrhosis prevalence in dialysis patients**

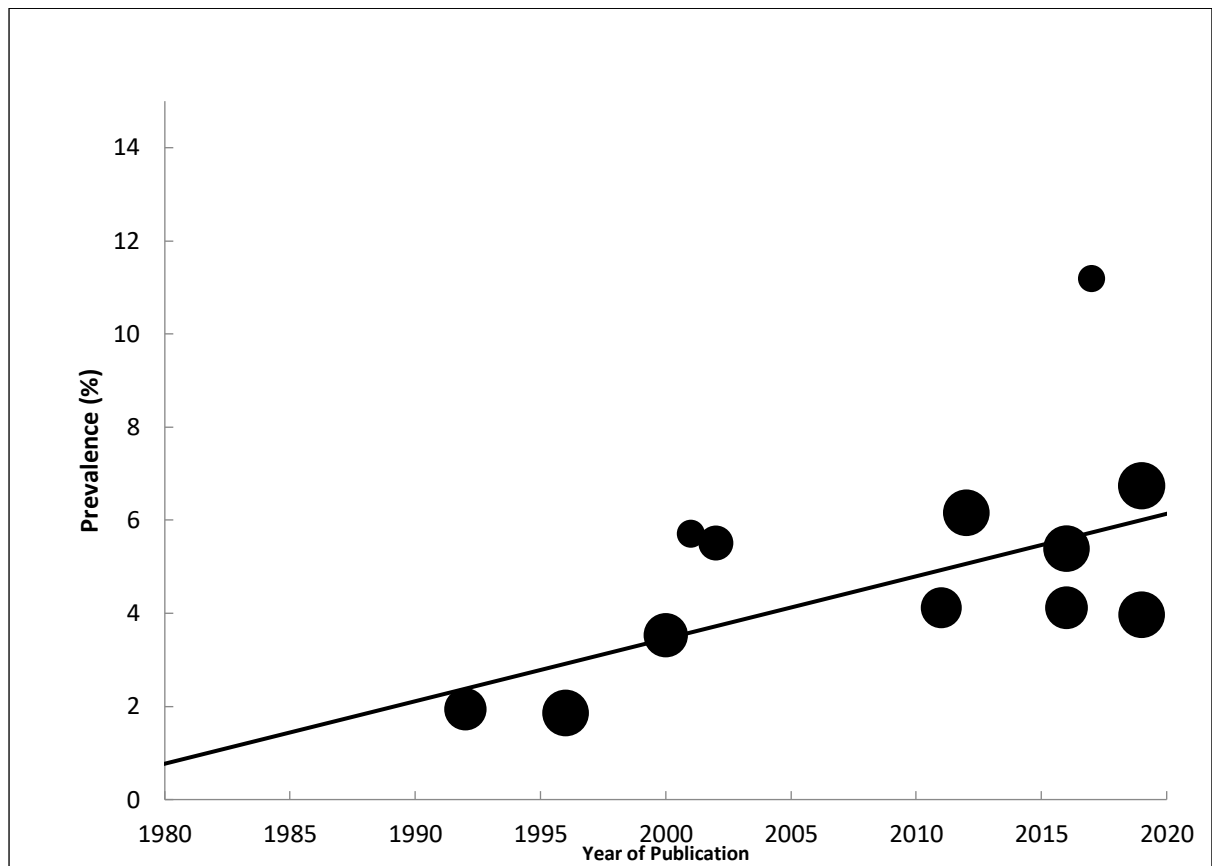

P = 0.027

Supplemental Figure 8 Funnel plot for prevalence data

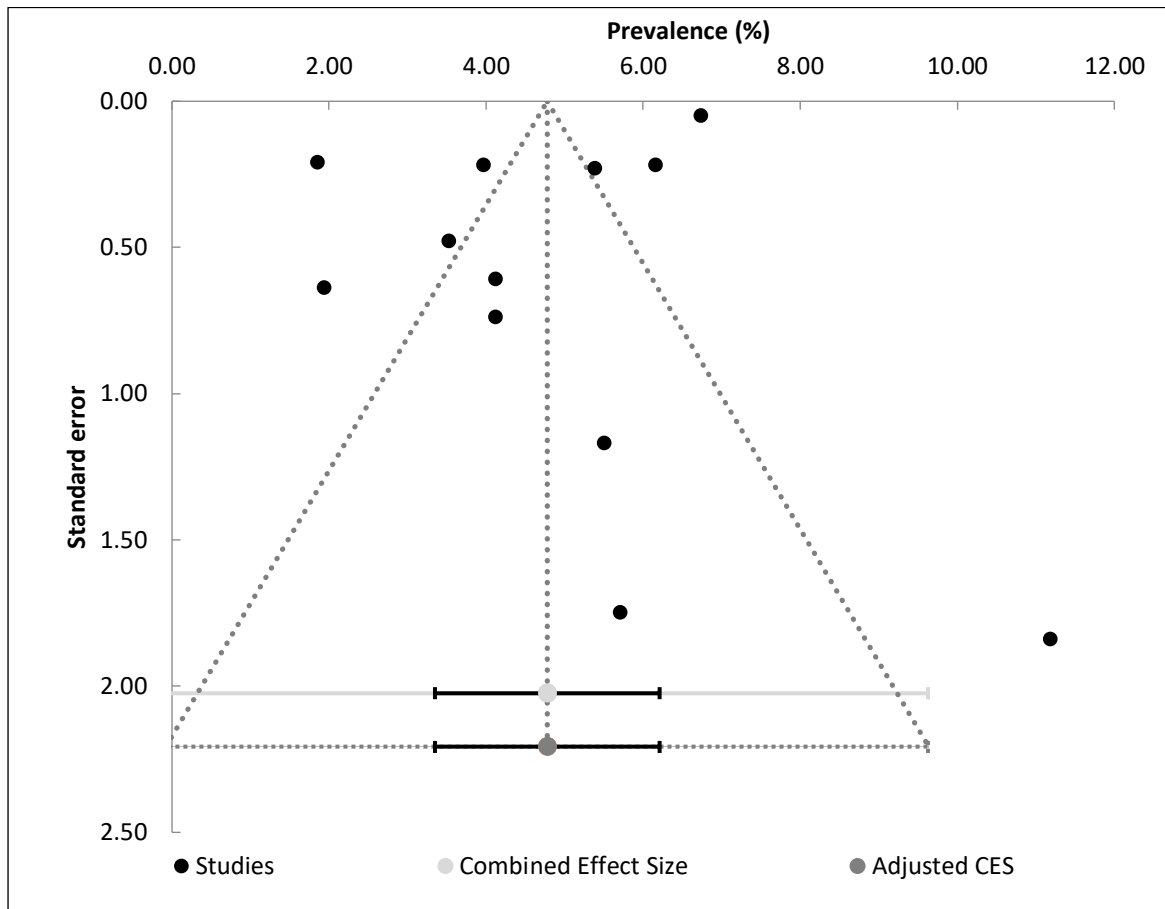

Egger Regression Test  $p = 0.058$ ; CES = Combined Effect Size
